# Supplementary material for: Nanoparticles of Costus speciosus Ameliorate Diabetes-Induced Structural Changes in Rat Prostate through Mediating the Pro-Inflammatory Cytokines IL 6, IL1β and TNF-α
Source: MDPI journal article supplement (doi:10.3390/molecules27031027), 2022-02-02
Supplement: s1 [file s1]

**Table S1.** Gene specific primers utilized in this study.

| Gene              | Sequence                                                                       |
|-------------------|--------------------------------------------------------------------------------|
| rat-GAPDH         | (Forward 5'-CAACTCCCTCAAGATTGTCAGCAA-3', Reverse5-'GGCATGGACTGTGGTCATGA-3'.    |
| rat-TNF- $\alpha$ | (Forward 5'-CCCTGGTACTAACTCCCAGAAA-3', Reverse, 5'-TGTATGA-GAGGGACGGAACC-3'.   |
| rat-IL-6          | (Forward 5'-CTGCAAGAGACTTCCATCCAG-3', Reverse, 5'-AGTGG-TATAGACAGGTCTGTTGG-3'. |
| rat-IL1 $\beta$   | Forward 5'-CTTATGCCTTCAACGGAGGT-3, Reverse 5'-GTGTCTGAA-GCAACGATGGA-3'.        |
